# Supplementary material
Source: PubMed Central journal article supplement (PMC6166720)
Supplement: supp_RA118.004444_138792_1_supp_184776_pdgmyz.pdf [file supp_RA118.004444_138792_1_supp_184776_pdgmyz.pdf]

## Supporting Information

### **Biochemical properties and *in planta* effects of NopM, a rhizobial E3 ubiquitin ligase**

Chang-Chao Xu, Di Zhang, Dagmar R. Hann, Zhi-Ping Xie, and Christian Staehelin

Journal of Biological Chemistry

This file contains:

**Supplemental Figure S1:** Amino acid sequence of NopM.

**Supplemental Figure S2:** Schematic representation of NopM variants used in this study.

**Supplemental Figure S3:** Effects of USP5 on autoubiquitination of NopM.

**Supplemental Figure S4:** Analysis of intermolecular transfer of ubiquitin in autoubiquitination reactions with NEL or NEL-C338A proteins.

**Supplemental Figure S5:** Subcellular localization of NopM in *Arabidopsis* protoplasts.

**Supplemental Table S1:** Strains and plasmids used in this work.

**Supplemental Table S2:** Primers used in this work.

```

1  MNVQRPGLAV  GPLFENPESE  SSEPGSPAAA  ARWVEASTE  EASAASSSQG  QIVAAPTAE
61  RPWEGRPQEA  VSRTRAWREA  GDVDEPLDLS  FLSLTPLSIP  LVSGLRRLNV  NNNQLGDL
121  TLPGTLLLELE  ASENRLTRL  DLPAGLQRLN  VENNRLTNLP  EPLPAALEWL  GAGYNQLTR
181  PEMIPPELIW  LGARNNQLTS  VPESLLTQLG  QWSSIDLENN  PLPHGVQTNL  VTAMHAAGYA
241  GPQIFLPMGP  VELARRPLHE  VVADWLEGDL  ETVAAWRGFA  NEQGARDYAH  FLDRLRRTV
301  YGNDAFRQAV  AIGLRQAVAR  PQLRAQYFEQ  ASGASDSCED  RITLWTWNGM  TALLIADVED
361  GVDGSLHQL  LQHGRVMFRL  EALDGIARET  VNLSLRRTDP  ADIDEIEVYL  AYQTQLRDT
421  ELRHVAPDMR  FLNVSHVTEE  DVARAASSVR  ELEARGFGEY  VATRWQPWER  VMRRIAPAS
481  AAMQEQLIEA  MGEEFRSRLD  EKLAEHGLTG  DADAERVFGA  EILNDIARRI  KGETMEKVL
541  GRGLEL

```

**S26:** Phosphorylation site identified in this study

**C338:** Catalytic cysteine

**D340:** Predicted catalytic acid

**D404:** Predicted catalytic base

**K502, K531 and K537:** Predicted autoubiquitination sites

**Supplemental Figure S1.** Amino acid sequence of NopM (nodulation outer protein M of *Sinorhizobium* sp. NGR234; accession number: NP\_443862). S26 was identified as potential phosphorylation site in this study. The C338 residue is required for catalytic activity (Xin et al. 2012, PLoS Pathog. 8(5): e1002707). D340 and D404 are predicted to function as catalytic acid and catalytic base, respectively (Keszei and Sicheri, 2017, Proc. Natl. Acad. Sci. USA 114: 1311-1316). The lysine residues K502, K531 and K537 are predicted autoubiquitination sites.

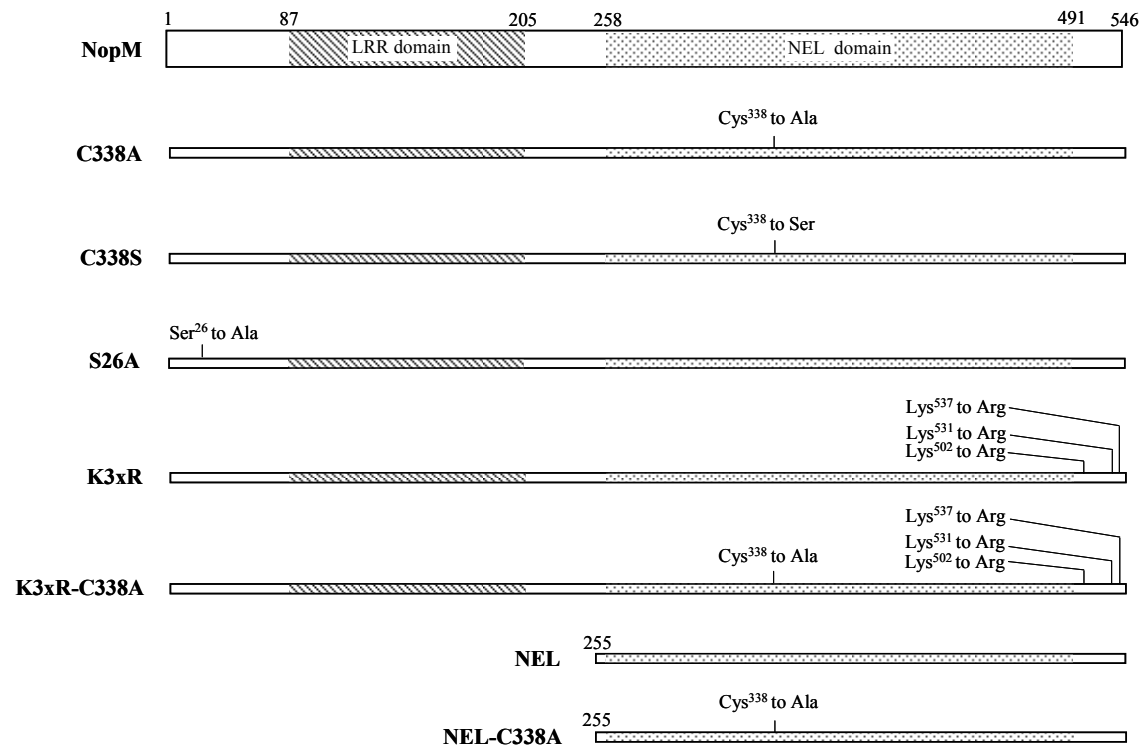

**Supplemental Figure S2.** Schematic representation of NopM variants used in this study. The LRR domain contains several leucine-rich repeats and the C-terminal NEL (novel E3 ubiquitin ligase domain) domain is necessary for catalytic activity. The C338A variant lacks enzyme activity and the C338S variant likely forms a mono-ubiquitinated conjugate. The S26A variant was used in the phosphorylation experiments. The K3xR variant without lysine residues and the enzymatically inactive form K3xR-C338A were used in autoubiquitination tests. The NEL protein (residues 255-546 with an N-terminal methionine) showed strong enzymatic activity while the corresponding full-length protein NEL-C338A was inactive. Proteins with corresponding tags were expressed in *Escherichia coli*.

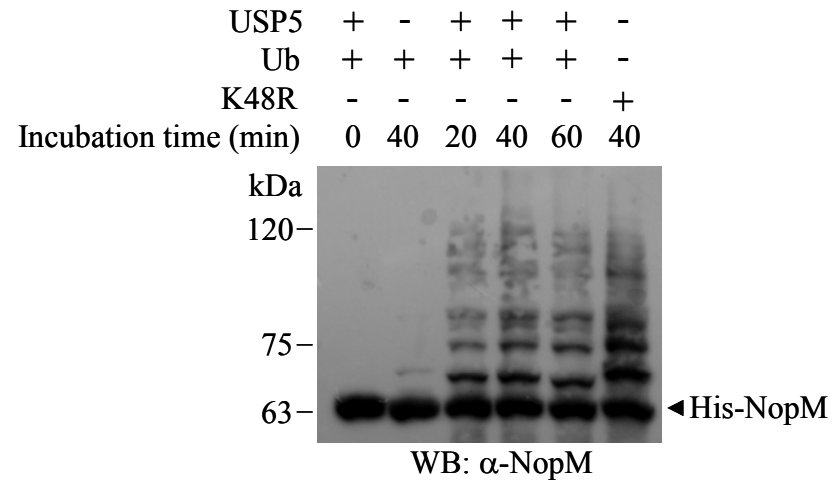

**Supplemental Figure S3.** Effects of USP5 on autoubiquitination of NopM. The USP5 enzyme (0.5 μg) was added to the ubiquitination reaction system containing E1, E2, His-tagged NopM and either ubiquitin (Ub) or the K48R ubiquitin variant. Reactions were performed at 37 °C for the indicated time. Autoubiquitination of His-NopM was visualized by Western blot analysis with anti-NopM antibodies.

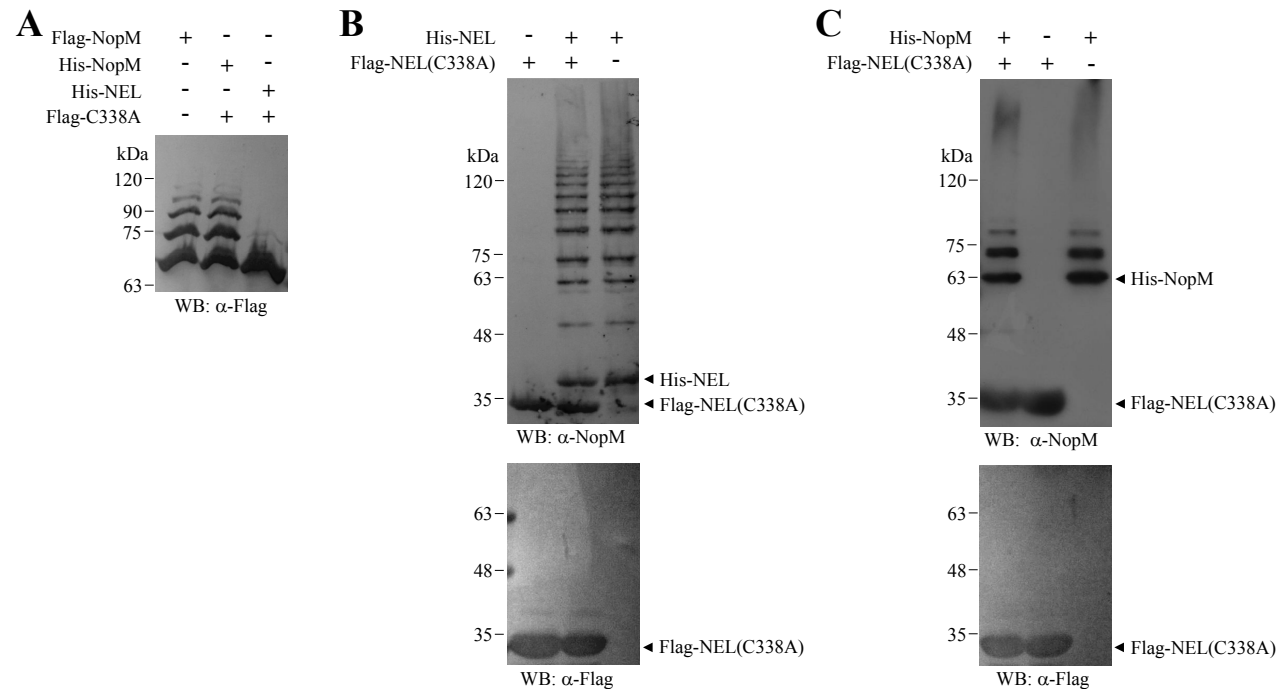

**Supplemental Figure S4.** Analysis of intermolecular transfer of ubiquitin in autoubiquitination reactions with NEL or NEL-C338A proteins. The ubiquitination reactions with E1, E2 and indicated proteins were performed at 37 °C for 1.5 h. (A) Reactions with His-NEL and Flag-C338A resulted in no (or very low) intermolecular transfer of ubiquitin. Autoubiquitination reactions with Flag-NopM alone or His-NopM with Flag-C338A were performed for comparison. Flag-C338A was detected on a Western blot with an anti-Flag antibody. (B) Incubation of His-NEL with Flag-NEL(C338A) resulted in no (or very low) intermolecular transfer of ubiquitin. Flag-NEL(C338A) or His-NEL alone were used in control reactions. Reaction products were analyzed on Western blots with anti-NopM or anti-Flag antibodies. (C) Incubation of His-NopM with Flag-NEL(C338A) also resulted in no (or very low) intermolecular transfer of ubiquitin. Control reactions were performed with His-NopM or Flag-NEL(C338A) alone. Western blots were performed with anti-NopM or anti-Flag antibodies.

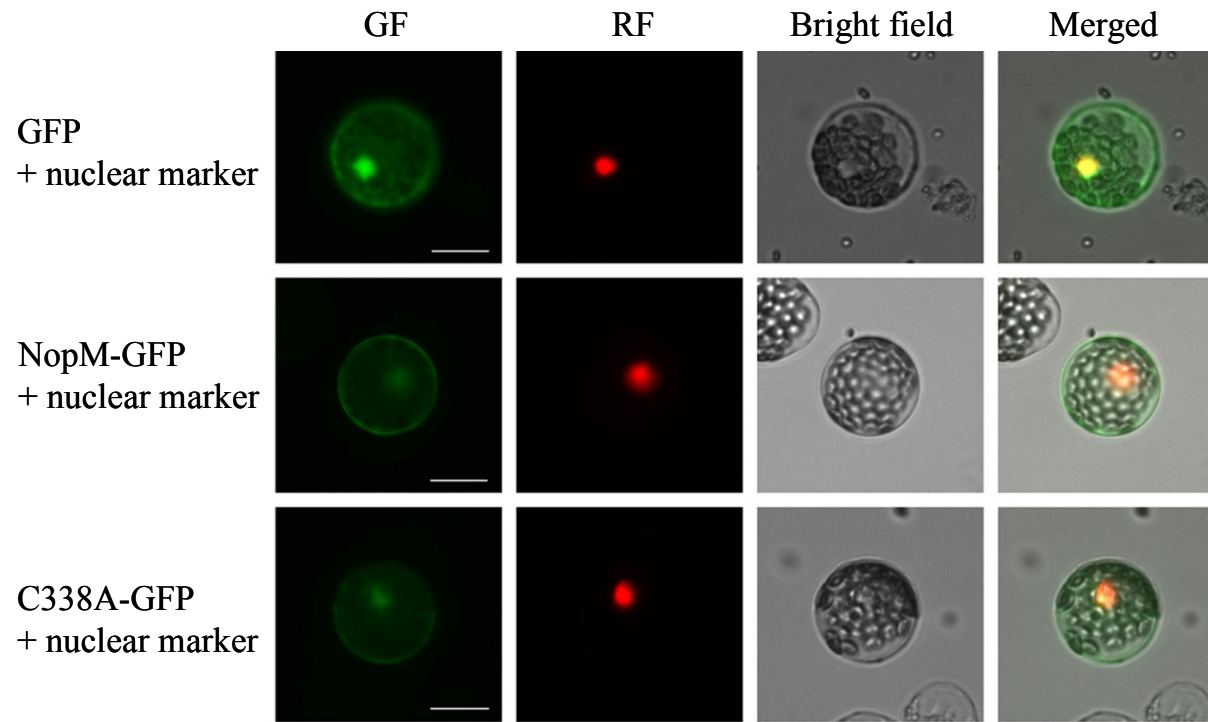

**Supplemental Figure S5.** Subcellular localization of NopM in *Arabidopsis* protoplasts. NopM, C338A fused with a C-terminal GFP tag, were transiently expressed in *Arabidopsis* protoplasts. GFP was expressed alone as a control. Co-expressed ARF4-RFP served as a nuclear marker. Protoplasts were microscopically analyzed for green fluorescence (GF), red fluorescence (RF) and under bright field conditions. Bars: 20  $\mu$ m.

**Supplemental Table S1.** Strains and plasmids used in this work.

| Strains or Plasmids                                 | Description*                                                                                                                                                                                 | Reference or Source                                                                 |
|-----------------------------------------------------|----------------------------------------------------------------------------------------------------------------------------------------------------------------------------------------------|-------------------------------------------------------------------------------------|
| <i>Escherichia coli</i> DH5 $\alpha$                | <i>supE44</i> $\Delta$ <i>lacU169</i> ( $\Phi$ 80 <i>lacZ</i> $\Delta$ M15)<br><i>hsdR17 recA1 endA1 gyrA96 thi-1, relA1</i>                                                                 | Invitrogen, Carlsbad, CA, USA                                                       |
| <i>Escherichia coli</i> BL21 (DE3)                  | F <sup>-</sup> <i>ompT hsdSB</i> ( $r_B^- m_B^-$ ) <i>gal dcm</i> (DE3)                                                                                                                      | Novagen (Merck Chemicals, Darmstadt, Germany)                                       |
| <i>Agrobacterium tumefaciens</i> EHA105             | A hypervirulent <i>Agrobacterium tumefaciens</i> strain (Rif <sup>r</sup> )                                                                                                                  | Hood et al., 1993                                                                   |
| <i>Agrobacterium rhizogenes</i> LBA9402             | Harboring the root-inducing (Ri) plasmid pRil855 (Rif <sup>r</sup> )                                                                                                                         | Hooykaas et al., 1977                                                               |
| GFP-expressing <i>Mesorhizobium loti</i> MAFF303099 | <i>Mesorhizobium loti</i> MAFF303099 derivative constitutively expressing GFP (Rif <sup>r</sup> )                                                                                            | Kindly provided by Zhong-Ming Zhang, Huazhong Agricultural University, Wuhan, China |
| pET28a                                              | Expression vector for production of His tagged proteins (Kan <sup>r</sup> )                                                                                                                  | Novagen (Darmstadt, Germany)                                                        |
| pET28a- <i>nopM</i>                                 | A pET28a derivative carrying an <i>EcoR</i> I- <i>BamH</i> I fragment containing the <i>nopM</i> coding region amplified from genomic DNA of NGR234 with primers 1 and 2 (Kan <sup>r</sup> ) | This study                                                                          |

|                             |                                                                                                                                                                                              |                             |
|-----------------------------|----------------------------------------------------------------------------------------------------------------------------------------------------------------------------------------------|-----------------------------|
| pET28a-NEL                  | A pET28a derivative carrying an <i>EcoR</i> I- <i>BamH</i> I fragment encoding the NEL domain amplified from genomic DNA of NGR234 with primers 2 and 45 (Kan <sup>r</sup> )                 | This study                  |
| pRT104                      | Vector containing the cauliflower mosaic virus 35S promoter and a poly-(A) signal (Amp <sup>r</sup> )                                                                                        | Töpfer <i>et al.</i> , 1987 |
| pRT104- <i>nopM</i>         | A pRT104 derivative carrying an <i>EcoR</i> I- <i>BamH</i> I fragment containing the <i>nopM</i> coding region amplified from genomic DNA of NGR234 with primers 3 and 4 (Amp <sup>r</sup> ) | This study                  |
| pRT104- <i>nopM</i> (C338A) | PCR-based site directed mutagenesis of pRT104- <i>nopM</i> ; amplification with primers 9 and 10 to substitute Cys338 with alanine (C338A) (Amp <sup>r</sup> )                               | This study                  |
| pRT104- <i>nopM</i> (C338S) | PCR-based site directed mutagenesis of pRT104- <i>nopM</i> ; amplification with primers 5 and 6 to substitute Cys338 with serine (C338S) (Amp <sup>r</sup> )                                 | This study                  |
| pRT104- <i>nopM</i> (D340N) | PCR-based site directed mutagenesis of pRT104- <i>nopM</i> ; amplification with primers 7 and 8 to substitute Asp340 with Asn (D340N) (Amp <sup>r</sup> )                                    | This study                  |
| pRT104- <i>nopM</i> (S26A)  | PCR-based site directed mutagenesis of pRT104- <i>nopM</i> ; amplification with primers 46 and 47 to substitute Ser26 with alanine (S26A) (Amp <sup>r</sup> )                                | This study                  |



|                                       |                                                                                                                                                                                                        |                             |
|---------------------------------------|--------------------------------------------------------------------------------------------------------------------------------------------------------------------------------------------------------|-----------------------------|
| pRT104- <i>nopM</i> (C338A-K502R)     | PCR-based site directed mutagenesis of pRT104- <i>nopM</i> (C338A); amplification with primers 11 and 12 to substitute Lys502 with arginine (K502R) (Amp <sup>r</sup> )                                | This study                  |
| pRT104- <i>nopM</i> (C338A-K502&531R) | PCR-based site directed mutagenesis of pRT104- <i>nopM</i> (C338A-K502R); amplification with primers 13 and 14 to substitute Lys531 with arginine (K531R) (Amp <sup>r</sup> )                          | This study                  |
| pRT104- <i>nopM</i> (C338A-K3xR)      | PCR-based site directed mutagenesis of pRT104- <i>nopM</i> (C338A-K502&531R); amplification with primers 15 and 16 to substitute Lys537 with arginine (K537R) (Amp <sup>r</sup> )                      | This study                  |
| pET28a- <i>nopM</i> (C338A)           | A pET28a derivative carrying an <i>EcoR</i> I- <i>BamH</i> I fragment containing <i>nopM</i> (C338A) coding region amplified from pRT104- <i>nopM</i> (C338A) with primers 1 and 2 (Kan <sup>r</sup> ) | This study                  |
| pCAMBIA 1302                          | Binary vector with a cauliflower mosaic virus (CaMV) 35S promoter and a coding sequence of GFP, (Kan <sup>r</sup> )                                                                                    | Cambia, Canberra, Australia |
| pCAMBIA 1302- <i>nopM</i>             | A pCAMBIA 1302 derivative carrying a 35S CaMV- <i>nopM</i> fragment released from pRT104- <i>nopM</i> with <i>Hind</i> III (Kan <sup>r</sup> )                                                         | This study                  |
| pCAMBIA 1302- <i>nopM</i> (C338A)     | A pCAMBIA 1302 derivative carrying a 35S CaMV- <i>nopM</i> (C338A) fragment released from pRT104- <i>nopM</i> (C338A) with <i>Hind</i> III (Kan <sup>r</sup> )                                         | This study                  |

|                                   |                                                                                                                                                                                                                            |                                                                                                                |
|-----------------------------------|----------------------------------------------------------------------------------------------------------------------------------------------------------------------------------------------------------------------------|----------------------------------------------------------------------------------------------------------------|
| pCAMBIA 1302- <i>nopM</i> (D340N) | A pCAMBIA 1302 derivative carrying a 35S CaMV- <i>nopM</i> (D340N) fragment released from pRT104- <i>nopM</i> (D340N) with <i>Hind</i> III (Kan <sup>r</sup> )                                                             | This study                                                                                                     |
| pCAMBIA1302- <i>nopM</i> (S26D)   | A pCAMBIA 1302 derivative carrying a 35S CaMV- <i>nopM</i> (S26D) fragment released from pRT104- <i>nopM</i> (S26D) with <i>Hind</i> III (Kan <sup>r</sup> )                                                               | This study                                                                                                     |
| pCAMBIA1302- <i>nopM</i> (S26A)   | A pCAMBIA 1302 derivative carrying a 35S CaMV- <i>nopM</i> (S26A) fragment released from pRT104- <i>nopM</i> (S26A) with <i>Hind</i> III (Kan <sup>r</sup> )                                                               | This study                                                                                                     |
| pCAMBIA 1302- <i>nopM-gfp</i>     | A pCAMBIA 1302 derivative carrying the <i>nopM</i> coding region amplified from pRT104- <i>nopM</i> with primers 41 and 42; amplicon inserted with <i>Spe</i> I (Kan <sup>r</sup> )                                        | This study                                                                                                     |
| pX-DR                             | Transient expression vector with a coding sequence of DsRed under the control of a CaMV 35S promoter; contains the suicide gene marker <i>ccdB</i> inserted between two <i>Xcm</i> I restriction sites (Amp <sup>r</sup> ) | Kindly provided by Guo-Liang Wang (Hunan Agricultural University, Changsha, China) (Chen <i>et al.</i> , 2009) |
| pX-DR- <i>nopM</i>                | A pX-DR derivative carrying a <i>nopM</i> fragment amplified with primers 43 and 44 from genomic DNA of NGR234 and inserted with <i>Xcm</i> I (Amp <sup>r</sup> )                                                          | This study                                                                                                     |

|                                  |                                                                                                                                                                                                                   |                                                                                                      |
|----------------------------------|-------------------------------------------------------------------------------------------------------------------------------------------------------------------------------------------------------------------|------------------------------------------------------------------------------------------------------|
| pSAT1-nEYFP-N1                   | A bi-molecular fluorescence complementation vector with a multiple cloning site followed by the N-terminal coding region of enhanced YFP; expression under the control of a CaMV 35S promoter (Amp <sup>r</sup> ) | Kindly provided by Nan Yao, Sun Yat-Sen University, Guangzhou, China (Citovsky <i>et al.</i> , 2006) |
| pSAT1-cEYFP-N1                   | A bi-molecular fluorescence complementation vector with a multiple cloning site followed by the C-terminal coding region of enhanced YFP; expression under the control of a CaMV 35S promoter (Amp <sup>r</sup> ) | Kindly provided by Nan Yao, Sun Yat-Sen University, Guangzhou, China (Citovsky <i>et al.</i> , 2006) |
| pSAT1-nEYFP-N1- <i>nopM</i>      | A pSAT1-nEYFP-N1 derivative carrying an <i>EcoR</i> I- <i>Bam</i> H I fragment containing the <i>nopM</i> coding region amplified from pRT104- <i>nopM</i> with primers 39 and 40 (Amp <sup>r</sup> )             | This study                                                                                           |
| pSAT1-cEYFP-N1- <i>nopM</i>      | A pSAT1-cEYFP-N1 derivative carrying an <i>EcoR</i> I- <i>Bam</i> H I fragment containing the <i>nopM</i> coding region amplified from pRT104- <i>nopM</i> with primers 39 and 40 (Amp <sup>r</sup> )             | This study                                                                                           |
| pET28a- <i>nopM</i> (C338A-K3xR) | A pET28a derivative carrying an <i>EcoR</i> I- <i>Bam</i> H I fragment containing the <i>nopM</i> (C338A-K3xR) sequence amplified from pRT104- <i>nopM</i> (C338A-K3xR) with primers 1 and 2 (Kan <sup>r</sup> )  | This study                                                                                           |
| pET28a- <i>nopM</i> (K3xR)       | A pET28a- <i>nopM</i> (C338A-K3xR) derivative produced by site directed mutagenesis with primers 52 and 53 to substitute Ala338 with Cys (Kan <sup>r</sup> )                                                      | This study                                                                                           |

|                            |                                                                                                                                                                                                                                      |            |
|----------------------------|--------------------------------------------------------------------------------------------------------------------------------------------------------------------------------------------------------------------------------------|------------|
| pET28a-E1( <i>AtUBA2</i> ) | A pET28a derivative carrying an <i>EcoR</i> I- <i>Not</i> I fragment containing the <i>UBA2</i> (At5g06460) coding region amplified from cDNA of <i>A. thaliana</i> ecotype C24 with primers 19 and 20 (Kan <sup>r</sup> )           | This study |
| pET28a-E2( <i>AtUBC8</i> ) | A pET28a derivative carrying an <i>EcoR</i> I- <i>Hind</i> III fragment containing the <i>Ubc8</i> (At5g53300) coding region amplified from cDNA of <i>A. thaliana</i> ecotype C24 with primers 21 and 22 (Kan <sup>r</sup> )        | This study |
| pET28a-Ub                  | A pET28a derivative carrying an <i>EcoR</i> I- <i>BamH</i> I fragment containing part of the <i>UBQ14</i> (At4g02890) coding region amplified from cDNA of <i>A. thaliana</i> ecotype C24 with primers 23 and 24 (Kan <sup>r</sup> ) | This study |
| pET28a-Ub(K48R)            | A pET28a- <i>Ub</i> derivative produced by site directed mutagenesis with primers 35 and 36 to substitute Lys48 with Arg (K48R) (Kan <sup>r</sup> )                                                                                  | This study |
| pET28a-Ub(K11R)            | A pET28a- <i>Ub</i> derivative produced by site directed mutagenesis with primers 27 and 28 to substitute Lys11 with Arg (K11R) (Kan <sup>r</sup> )                                                                                  | This study |
| pET28a-Ub(K6R)             | A pET28a- <i>Ub</i> derivative produced by site directed mutagenesis with primers 25 and 26 to substitute Lys6 with                                                                                                                  | This study |

|                           |                                                                                                                                                                                                 |                                                         |
|---------------------------|-------------------------------------------------------------------------------------------------------------------------------------------------------------------------------------------------|---------------------------------------------------------|
|                           | Arg (K6R) (Kan <sup>r</sup> )                                                                                                                                                                   |                                                         |
| pET28a-Ub(K33R)           | A pET28a- <i>Ub</i> derivative produced by site directed mutagenesis with primers 33 and 34 to substitute Lys33 with Arg (K33R) (Kan <sup>r</sup> )                                             | This study                                              |
| pGEX-4t-1                 | Prokaryotic expression vector for production of GST fusion proteins (Kan <sup>r</sup> )                                                                                                         | Amersham Biosciences/GE Healthcare, Buckinghamshire, UK |
| pGEX-4t-1- <i>nopM</i>    | A pGEX-4t-1 derivative carrying an <i>EcoR</i> I- <i>BamH</i> I fragment containing the <i>nopM</i> coding region amplified from genomic DNA of NGR234 with primers 1 and 2 (Amp <sup>r</sup> ) | This study                                              |
| pGEX-NtSIPK               | pGEX-4T-1 derivative carrying a <i>BamHI</i> - <i>EcoRI</i> fragment containing the coding region of <i>SIPK</i> of <i>Nicotiana tabacum</i> (Amp <sup>r</sup> )                                | Ge et al., 2016                                         |
| pGEX-NtMEK2 <sup>DD</sup> | pGEX-4T-1 derivative carrying a <i>SmaI</i> - <i>NotI</i> fragment containing the coding region of <i>MEK2<sup>DD</sup></i> of <i>Nicotiana tabacum</i> (Amp <sup>r</sup> )                     | Ge et al., 2016                                         |
| pGEX-LjSIP2               | pGEX-4T-1 derivative containing the coding region of <i>SIP2</i> of <i>Lotus japonicus</i> (Amp <sup>r</sup> )                                                                                  | Chen et al., 2012                                       |

|                                  |                                                                                                                                                                                                                |                                                          |
|----------------------------------|----------------------------------------------------------------------------------------------------------------------------------------------------------------------------------------------------------------|----------------------------------------------------------|
| pET28a- <i>flag-nopM</i>         | A pET28a derivative carrying an <i>EcoR</i> I- <i>BamH</i> I fragment containing the <i>nopM</i> coding region amplified from genomic DNA of NGR234 with primers 2 and 50 (Kan <sup>r</sup> )                  | This study                                               |
| pET28a- <i>flag-nopM</i> (C338A) | A pET28a derivative carrying an <i>EcoR</i> I- <i>BamH</i> I fragment containing the <i>nopM</i> coding region amplified from pRT104- <i>nopM</i> (C338A) with primers 2 and 50 (Kan <sup>r</sup> )            | This study                                               |
| pET28a-Flag- <i>nopM</i> (C338S) | A pET28a derivative carrying an <i>EcoR</i> I- <i>BamH</i> I fragment containing the <i>nopM</i> coding region amplified from pRT104- <i>nopM</i> (C338S) with primers 2 and 50 (Kan <sup>r</sup> )            | This study                                               |
| pISV2678                         | Binary vector with a double cauliflower mosaic virus (CaMV) 35S promoter                                                                                                                                       | Kindly provided by Eva Kondorosi, Gif-sur Yvette, France |
| pISV(RFP)                        | A pISV2678 derivative containing a 35S CaMV- <i>RFP</i> -poly A cassette (Kan <sup>r</sup> )                                                                                                                   | Constructed by Feng Yang (Yang, 2014)                    |
| pISV(RFP)- <i>nopM</i>           | A pISV(RFP) derivative containing a 35S CaMV- <i>nopM</i> -poly A cassette (Kan <sup>r</sup> ); a <i>Cla</i> I- <i>EcoR</i> I fragment containing the coding region of <i>nopM</i> was inserted into pISV(RFP) | Constructed by Feng Yang (Yang, 2014)                    |
| pET28a-Flag-NEL(C338A)           | A pET28a derivative carrying an <i>EcoR</i> I- <i>BamH</i> I fragment containing the <i>NEL</i> (C338A) coding region amplified from                                                                           | This study                                               |

|                                |                                                                                                                                                                                                                                |            |
|--------------------------------|--------------------------------------------------------------------------------------------------------------------------------------------------------------------------------------------------------------------------------|------------|
|                                | pET28a- <i>nopM</i> (C338A) with primers 2 and 51 (Kan <sup>r</sup> )                                                                                                                                                          |            |
| pISV(RFP)- <i>nopM</i> (C338A) | A pISV(RFP) derivative containing a 35S CaMV- <i>nopM</i> (C338A)-poly A cassette (Kan <sup>r</sup> ); a <i>Cla</i> I- <i>Eco</i> R I fragment containing the coding region of <i>nopM</i> (C338A) was inserted into pISV(RFP) | This study |

---

\*Amp<sup>r</sup>, Kan<sup>r</sup>, Rif<sup>r</sup> resistance to ampicillin, kanamycin and rifampin, respectively.

References cited in Table S1:

- Chen, S., Songkumarn, P., Liu, J., and Wang, G. L. (2009) A versatile zero background T-vector system for gene cloning and functional genomics. *Plant Physiol.* **150**, 1111-1121
- Chen, T., Zhu, H., Ke, D., Cai, K., Wang, C., Gou, H., Hong, Z., and Zhang, Z. (2012) A MAP kinase kinase interacts with SymRK and regulates nodule organogenesis in *Lotus japonicus*. *Plant Cell.* **24**, 823-38
- Citovsky, V., Lee, L. Y., Vyas, S., Glick, E., Chen, M. H., Vainstein, A., Gafni, Y., Gelvin, S. B., and Tzfira, T. (2006) Subcellular localization of interacting proteins by bimolecular fluorescence complementation *in planta*. *J. Mol. Biol.* **362**, 1120-1131
- Ge, Y. Y., Xiang, Q. W., Wagner, C., Zhang, D., Xie, Z. P., and Staehelin, C. (2016) The type 3 effector NopL of *Sinorhizobium* sp. strain NGR234 is a mitogen-activated protein kinase substrate. *J. Exp. Bot.* **67**, 2483-2494
- Hood, E. E., Gelvin, S. B., Melchers, S., and Hoekema A. (1993) New *Agrobacterium* helper plasmids for gene transfer to plants (EHA105).

*Transgenic Res.* **2**, 208-218.

Hooykaas, P. J. J., Klapwijk, P. M., Nuti, M. P., Schilperoort, R. A., and Rörsch, A. (1977) Transfer of the *Agrobacterium tumefaciens* Ti plasmid to a-virulent agrobacteria and to *Rhizobium* explanta. *Microbiology* **98**, 477-484

Töpfer, R., Matzeit, V., Gronenborn, B., Schell, J., and Steinbiss, H. H. (1987) A set of plant expression vectors for transcriptional and translational fusions. *Nucleic Acids Res.* **15**, 5890

Yang, F. (2014) Expression of type 3 effector genes from *Rhizobium* sp. strain NGR234 in *Lotus japonicus* and *Galega orientalis*. Master's thesis, Sun Yat-sen University, Guangzhou, China



**Supplemental Table S2.** Primers used in this work.

| No. | Sequence (5' to 3')                  | Restriction site | Description                                                                       |
|-----|--------------------------------------|------------------|-----------------------------------------------------------------------------------|
| 1   | cgggatcc atgaatgtacaacggcccgg        | <i>Bam</i> H I   | For construction of pET28a- <i>nopM</i> .                                         |
| 2   | cggaattc tcacagctcaagaccgcgacc       | <i>Eco</i> R I   |                                                                                   |
| 3   | cgc gaattc atgaatgtac aacggcccgg     | <i>Eco</i> R I   | For construction of pRT104- <i>nopM</i> .                                         |
| 4   | cgc ggatcc tcacagctca agaccgcgacc    | <i>Bam</i> H I   |                                                                                   |
| 5   | ggagctagc gatagctcagaggatcgcatt act  |                  | Site-directed mutagenesis; for construction of pRT104- <i>nopM</i> (C338S).       |
| 6   | agtaatgcgac cctctgagctatcgctagc tcc  |                  |                                                                                   |
| 7   | ctagc gatagctgtgagaatcgcattactttgacc |                  | Site-directed mutagenesis; for construction of pRT104- <i>nopM</i> (D340N).       |
| 8   | ggtcaaagtaatgcgattctcacagctatcgctag  |                  |                                                                                   |
| 9   | ggagctagc gatagcgcctgaggatcgcattact  |                  | Site-directed mutagenesis; for construction of pRT104- <i>nopM</i> (C338A).       |
| 10  | agtaatgcgac cctcagcgcctatcgctagctcc  |                  |                                                                                   |
| 11  | ccgcttggacgaacggctcggcggagcacgg      |                  | Site-directed mutagenesis; for construction of pRT104- <i>nopM</i> (C338A-K502R). |
| 12  | ccgtgctcggcggagccgttcgtccaagcgg      |                  |                                                                                   |
| 13  | cgcccgcaggatccgaggcgagacaatggag      |                  | Site-directed mutagenesis; for construction of                                    |

|    |                                                |                 |                                                  |
|----|------------------------------------------------|-----------------|--------------------------------------------------|
| 14 | ctccattgtctcgcctcggatcctgcgggcg                |                 | pRT104- <i>nopM</i> (C338A-K502R&K531R).         |
| 15 | cgagacaatggagcgggtgcttcggggctc                 |                 | Site-directed mutagenesis; for construction of   |
| 16 | cgaccccgaaagcaccgctccattgtctcg                 |                 | pRT104- <i>nopM</i> (C338A-K3xR).                |
| 17 | c <u>ggaattc</u> atgaatgtacaacggcccg           | <i>EcoR</i> I   | For construction of pET28a- <i>nopM</i> .        |
| 18 | c <u>gaagctt</u> cacagctcaagaccgcgacc          | <i>Hind</i> III |                                                  |
| 19 | c <u>ggaattc</u> atggaaccattcgttgaagg          | <i>EcoR</i> I   | For construction of pET28a- E1( <i>AtUBA2</i> ). |
| 20 | ataagaat <u>cggccgc</u> tcaggcgaagtagactgatacg | <i>Not</i> I    |                                                  |
| 21 | c <u>ggaattc</u> atggcgtcgaagcggatcttg         | <i>EcoR</i> I   | For construction of pET28a-E2( <i>AtUBC10</i> ). |
| 22 | cc <u>aagctt</u> ttagccatggcatactctg           | <i>Hind</i> III |                                                  |
| 23 | c <u>gggatcc</u> atgcagatct ttgtaagac          | <i>BamH</i> I   | For construction of pET28a-Ub( <i>AtUBQ14</i> ). |
| 24 | c <u>ggaattc</u> tcaaccaccacggagcctga          | <i>EcoR</i> I   |                                                  |
| 25 | gcagatctttgtaggacttcaccgg                      |                 | Site-directed mutagenesis; for construction of   |
| 26 | ccggtgagagtctaacaagatctgc                      |                 | pET28a-Ub(K6R).                                  |
| 27 | gacttcaccgga aggactatcaccctc                   |                 | Site-directed mutagenesis; for construction of   |
| 28 | gagggtgatagtccttccggtgagagtc                   |                 | pET28a-Ub(K11R).                                 |
| 29 | catcgacaacgttagggccaagatccagg                  |                 | Site-directed mutagenesis; for construction of   |
| 30 | cctggatcttggccctaactgttcgatg                   |                 | pET28a-Ub(K27R).                                 |

|    |                                         |               |                                                                                                                 |
|----|-----------------------------------------|---------------|-----------------------------------------------------------------------------------------------------------------|
| 31 | caacgttaaggccaggatccaggataagg           |               | Site-directed mutagenesis; for construction of                                                                  |
| 32 | ccttatcctggatcctggccttaacgttg           |               | pET28a-Ub(K29R).                                                                                                |
| 33 | caagatccaggataggggaaggcattcctc          |               | Site-directed mutagenesis; for construction of                                                                  |
| 34 | gaggaatgccttccctatcctggatcttg           |               | pET28a-Ub(K33R).                                                                                                |
| 35 | gatcttcgctgg gcggcagttggaggatg          |               | Site-directed mutagenesis; for construction of                                                                  |
| 36 | catcctccaactgccgccagcgaagatc            |               | pET28a-Ub(K48R).                                                                                                |
| 37 | ctacaacatccagagggagtccacacttc           |               | Site-directed mutagenesis; for construction of                                                                  |
| 38 | gaagtgtggactccctctggatgttag             |               | pET28a-Ub(K63R).                                                                                                |
| 39 | <u>cggaattc</u> atgaatgtacaacggcccgg    | <i>EcoR</i> I | For construction of pSAT1-nEYFP-N1- <i>nopM</i> .                                                               |
| 40 | <u>cgggatccc</u> cagctcaagaccgcgaccc    | <i>BamH</i> I |                                                                                                                 |
| 41 | <u>ggactagt</u> atgaatgtacaacggcccgg    | <i>Spe</i> I  | For construction of pCAMBIA1302- <i>nopM-gfp</i> .                                                              |
| 42 | <u>ggactagt</u> cagctcaagaccgcgaccc     | <i>Spe</i> I  |                                                                                                                 |
| 43 | aatgaatgtacaacggcccgg                   |               | For construction of pX-DR - <i>nopM</i>                                                                         |
| 44 | tcacagctcaagaccgcgaccc                  |               |                                                                                                                 |
| 45 | <u>cgggatcc</u> cagga ccgca gatct ttttg | <i>BamH</i> I | Upper primer used for amplification of the NEL domain sequence of <i>nopM</i> ; for construction of pET28a-NEL. |
| 46 | agttcagaac caggggctcc ggccgcccgc        |               | Site-directed mutagenesis; for construction of                                                                  |

|    |                                                                     |               |                                                                               |
|----|---------------------------------------------------------------------|---------------|-------------------------------------------------------------------------------|
| 47 | ggcggcggccg gagcccctggt tctgaact                                    |               | pRT104- <i>nopM</i> (S26A).                                                   |
| 48 | agttcagaac caggggatcc ggccgcccgc                                    |               | Site-directed mutagenesis; for construction of<br>pRT104- <i>nopM</i> (S26D). |
| 49 | ggcggcggc cggatcccctg gttctgaact                                    |               |                                                                               |
| 50 | <u>cgggatcc</u> gattacaaggatgacgacgataag<br>atgaatgtacaacggcccgg    | <i>BamH</i> I | Upper primer; for construction of pET28a- <i>flag</i><br>- <i>nopM</i> .      |
| 51 | <u>cgggatcc</u> gattacaaggatgacgacgataag<br>cagga ccgca gatct ttttg | <i>BamH</i> I | Upper primer; for construction of pET28a- <i>flag</i><br>- <i>NEL</i> .       |
| 52 | gctagcgata gctgtgaggt cgcattac                                      |               | Site-directed mutagenesis; for construction of<br>pRT104- <i>nopM</i> (K3xR). |
| 53 | gtaatgcgatcctcacagctatcgetagc                                       |               |                                                                               |

---
